# Supplementary material
Source: PubMed Central journal article supplement (PMC6292745)
Supplement: NIHMS959852-supplement-supplement_1.pdf [file NIHMS959852-supplement-supplement_1.pdf]

## Supplementary information

**Table S1 Scoring system for diagnosis of polycystic ovary syndrome**

| Question                                                                                                                                                                                                                                                                                                                                                                                      | Criteria to attain score value                                                                                                                            | Score value        |
|-----------------------------------------------------------------------------------------------------------------------------------------------------------------------------------------------------------------------------------------------------------------------------------------------------------------------------------------------------------------------------------------------|-----------------------------------------------------------------------------------------------------------------------------------------------------------|--------------------|
| <p><b>Have you ever been told by a doctor that you had PCOS?</b></p> <ul style="list-style-type: none"> <li>• Yes</li> <li>• No</li> </ul>                                                                                                                                                                                                                                                    |                                                                                                                                                           |                    |
| <p><b>Between the ages of 16 and 40, about how long was your average menstrual cycle (time from first day of one period to the first day of the next period)? (select ONE only)</b></p> <ul style="list-style-type: none"> <li>• &lt;25 d</li> <li>• 25-34 d</li> <li>• 35-60 d</li> <li>• More than 60 d</li> <li>• Totally variable</li> </ul>                                              | <p>Participant indicates any one of</p> <ul style="list-style-type: none"> <li>• 35-60 d</li> <li>• more than 60 d</li> <li>• totally variable</li> </ul> | 1                  |
| <p><b>During your menstruating years (not including during pregnancy), did you have a tendency to grow dark, coarse hair on your (circle ALL that apply)</b></p> <ul style="list-style-type: none"> <li>• upper lip?</li> <li>• chin?</li> <li>• breasts?</li> <li>• chest between the breasts?</li> <li>• back?</li> <li>• belly?</li> <li>• upper arms?</li> <li>• upper thighs?</li> </ul> | Participant indicates 3 or more sites                                                                                                                     | 1                  |
| <p><b>Between the ages of 16 and 40, have you ever noticed a milky discharge from your nipples (not including during pregnancy or recent childbirth)? (circle ONE)</b></p> <ul style="list-style-type: none"> <li>• Yes</li> <li>• No</li> </ul>                                                                                                                                              | <p>Participant indicates Yes</p> <p>Participant indicates No</p>                                                                                          | <p>-1</p> <p>0</p> |
| <p><b>Whether participants were obese or overweight according to the mean BMI at adult visits.</b></p>                                                                                                                                                                                                                                                                                        |                                                                                                                                                           |                    |

- Yes
- No

Participant indicates Yes 1

**A diagnosis of PCOS**

If participant answered "Yes" to the first question;  
or  
total score value  $\geq 2$ .

---

**Table S2. Childhood cardiovascular risk factors by time period and reported fertility difficulties in adulthood, adjusted for PCOS**

| Cardiovascular Risk Factors | Ever sought medical help |           | Ever tried but unable |           | unprotected sex >1 year |           | Received medical help |           | Any fertility difficulties† |           | Never got pregnant |           |
|-----------------------------|--------------------------|-----------|-----------------------|-----------|-------------------------|-----------|-----------------------|-----------|-----------------------------|-----------|--------------------|-----------|
|                             | OR                       | 95% CI    | OR                    | 95% CI    | OR                      | 95% CI    | OR                    | 95% CI    | OR                          | 95% CI    | OR                 | 95% CI    |
| <b>SBP</b>                  |                          |           |                       |           |                         |           |                       |           |                             |           |                    |           |
| Child (<12)                 | 1.06                     | 0.75-1.51 | 0.95                  | 0.72-1.27 | 0.97                    | 0.74-1.28 | 0.95                  | 0.59-1.53 | 0.90                        | 0.71-1.14 | 0.96               | 0.68-1.35 |
| Adolescent (>=12, <18)      | 1.30                     | 0.90-1.87 | 1.28                  | 0.95-1.72 | 0.96                    | 0.73-1.26 | 1.56                  | 0.96-2.55 | 1.04                        | 0.82-1.32 | 1.06               | 0.72-1.55 |
| <b>DBP</b>                  |                          |           |                       |           |                         |           |                       |           |                             |           |                    |           |
| Child (<12)                 | 1.11                     | 0.79-1.56 | 0.85                  | 0.65-1.13 | 0.84                    | 0.63-1.11 | 1.05                  | 0.64-1.73 | 0.79                        | 0.63-1.00 | 1.11               | 0.79-1.54 |
| Adolescent (>=12, <18)      | 0.91                     | 0.63-1.31 | 1.10                  | 0.81-1.48 | 0.87                    | 0.66-1.14 | 1.07                  | 0.66-1.72 | 0.92                        | 0.73-1.17 | 1.01               | 0.69-1.48 |
| <b>LDL</b>                  |                          |           |                       |           |                         |           |                       |           |                             |           |                    |           |
| Child (<12)                 | 1.09                     | 0.76-1.55 | 1.21                  | 0.90-1.61 | 1.24                    | 0.93-1.64 | 1.38                  | 0.82-2.30 | 1.14                        | 0.90-1.44 | 1.40               | 0.98-1.98 |
| Adolescent (>=12, <18)      | 0.98                     | 0.64-1.51 | 0.92                  | 0.65-1.30 | 1.05                    | 0.76-1.45 | 1.23                  | 0.70-2.17 | 0.97                        | 0.74-1.28 | 1.35               | 0.87-2.11 |
| <b>HDL</b>                  |                          |           |                       |           |                         |           |                       |           |                             |           |                    |           |
| Child (<12)                 | 0.93                     | 0.65-1.34 | 0.90                  | 0.67-1.22 | 1.03                    | 0.77-1.37 | 1.05                  | 0.62-1.77 | 1.02                        | 0.80-1.30 | 1.08               | 0.76-1.55 |
| Adolescent (>=12, <18)      | 0.99                     | 0.66-1.50 | 0.75                  | 0.53-1.06 | 0.77                    | 0.56-1.07 | 1.17                  | 0.67-2.03 | 0.77                        | 0.59-1.02 | 0.82               | 0.53-1.28 |
| <b>Cholesterol</b>          |                          |           |                       |           |                         |           |                       |           |                             |           |                    |           |
| Child (<12)                 | 0.89                     | 0.63-1.26 | 0.95                  | 0.71-1.25 | 1.16                    | 0.88-1.54 | 0.78                  | 0.47-1.30 | 1.05                        | 0.83-1.32 | 1.51               | 1.07-2.13 |
| Adolescent (>=12, <18)      | 0.99                     | 0.65-1.50 | 0.84                  | 0.60-1.18 | 0.83                    | 0.61-1.15 | 1.42                  | 0.81-2.49 | 0.82                        | 0.63-1.08 | 1.35               | 0.87-2.10 |
| <b>Triglycerides</b>        |                          |           |                       |           |                         |           |                       |           |                             |           |                    |           |

|                          |      |               |      |               |      |               |      |           |      |           |      |           |
|--------------------------|------|---------------|------|---------------|------|---------------|------|-----------|------|-----------|------|-----------|
| Child (<12)              | 1.41 | 0.97-<br>2.04 | 1.15 | 0.85-<br>1.56 | 1.14 | 0.84-<br>1.53 | 1.06 | 0.63-1.80 | 1.13 | 0.89-1.45 | 1.05 | 0.73-1.52 |
| Adolescent<br>(≥12, <18) | 0.82 | 0.54-<br>1.23 | 0.97 | 0.69-<br>1.37 | 1.05 | 0.76-<br>1.45 | 0.94 | 0.55-1.63 | 1.01 | 0.77-1.33 | 1.18 | 0.76-1.83 |
| <b>Glucose</b>           |      |               |      |               |      |               |      |           |      |           |      |           |
| Child (<12)              | 0.78 | 0.51-<br>1.20 | 0.70 | 0.48-<br>1.01 | 1.23 | 0.87-<br>1.74 | 0.63 | 0.32-1.23 | 1.03 | 0.77-1.38 | 0.79 | 0.51-1.20 |
| Adolescent<br>(≥12, <18) | 1.29 | 0.83-<br>2.02 | 1.19 | 0.82-<br>1.73 | 1.13 | 0.80-<br>1.60 | 1.23 | 0.69-2.21 | 1.10 | 0.82-1.48 | 1.23 | 0.76-1.99 |
| <b>Insulin</b>           |      |               |      |               |      |               |      |           |      |           |      |           |
| Child (<12)              | 0.83 | 0.40-<br>1.71 | 0.77 | 0.42-<br>1.40 | 0.83 | 0.47-<br>1.49 | 0.97 | 0.33-2.83 | 0.78 | 0.48-1.27 | 1.26 | 0.63-2.52 |
| Adolescent<br>(≥12, <18) | 1.02 | 0.54-<br>1.90 | 0.89 | 0.52-<br>1.52 | 0.75 | 0.45-<br>1.23 | 0.43 | 0.19-0.98 | 0.91 | 0.60-1.39 | 1.38 | 0.69-2.75 |

SBP, systolic blood pressure; DBP, diastolic blood pressure; HDL, high-density lipoprotein; LDL, low-density lipoprotein  
Estimates adjusted for education level, race, tobacco use history and BMI at time of measure, and BMI-squared.

**Table S3. Pre-pregnant cardiovascular risk factors, the Bogalusa Heart Study, adjusted for PCOS**

|               | Ever sought medical help |           | Ever tried but unable |           | unprotected sex >1 year |           | Received medical help |           | Any fertility difficulties† |           | Never got pregnant |           |
|---------------|--------------------------|-----------|-----------------------|-----------|-------------------------|-----------|-----------------------|-----------|-----------------------------|-----------|--------------------|-----------|
|               | OR                       | 95% CI    | OR                    | 95% CI    | OR                      | 95% CI    | OR                    | 95% CI    | OR                          | 95% CI    | OR                 | 95% CI    |
| SBP           | 2.22                     | 1.07-4.58 | 2.07                  | 1.17-3.67 | 1.18                    | 0.75-1.86 | 2.30                  | 0.76-6.93 | 1.51                        | 1.01-2.26 | 1.46               | 0.80-2.66 |
| DBP           | 0.99                     | 0.50-1.95 | 1.11                  | 0.65-1.89 | 0.77                    | 0.49-1.21 | 0.94                  | 0.34-2.60 | 0.93                        | 0.63-1.38 | 1.36               | 0.76-2.42 |
| LDL           | 0.96                     | 0.44-2.06 | 0.89                  | 0.49-1.59 | 0.97                    | 0.59-1.58 | 1.22                  | 0.42-3.54 | 0.95                        | 0.62-1.46 | 0.99               | 0.52-1.87 |
| HDL           | 1.76                     | 0.83-3.73 | 0.94                  | 0.52-1.68 | 0.63                    | 0.38-1.05 | 1.93                  | 0.65-5.75 | 0.78                        | 0.51-1.21 | 0.71               | 0.38-1.36 |
| Cholesterol   | 0.86                     | 0.40-1.85 | 0.83                  | 0.46-1.52 | 1.13                    | 0.68-1.86 | 0.99                  | 0.67-5.98 | 1.08                        | 0.70-1.67 | 1.20               | 0.63-2.28 |
| Triglycerides | 0.70                     | 0.34-1.45 | 0.99                  | 0.55-1.77 | 1.38                    | 0.84-2.29 | 0.44                  | 0.14-1.37 | 1.06                        | 0.69-1.64 | 1.32               | 0.70-2.47 |
| Glucose       | 2.04                     | 0.92-4.50 | 2.58                  | 1.34-4.94 | 1.01                    | 0.60-1.73 | 2.74                  | 0.80-9.36 | 1.18                        | 0.75-1.88 | 0.97               | 0.49-1.92 |
| Insulin       | 1.63                     | 0.60-4.44 | 1.32                  | 0.58-3.00 | 1.03                    | 0.50-2.13 | 0.71                  | 0.19-2.61 | 1.07                        | 0.58-1.96 | 0.70               | 0.27-1.85 |

SBP, systolic blood pressure; DBP, diastolic blood pressure; HDL, high-density lipoprotein; LDL, low-density lipoprotein  
 Estimates adjusted for education level, race, tobacco use history and BMI at time of measure, and BMI-squared.
